# Supplementary material for: Antibacterial, Antioxidation, UV-Blocking, and Biodegradable Soy Protein Isolate Food Packaging Film with Mangosteen Peel Extract and ZnO Nanoparticles
Source: MDPI journal article supplement (doi:10.3390/nano11123337), 2021-12-08
Supplement: s1 [file s1]

## Supplementary Materials

# Antibacterial, Antioxidation, UV-Blocking, and Biodegradable Soy Protein Isolate Food Packaging Film with Mangosteen Peel Extract and ZnO Nanoparticles

Xi Huang <sup>1</sup>, Xin Zhou <sup>1</sup>, Qingyin Dai <sup>1</sup> and Zhiyong Qin <sup>1,2,\*</sup>

<sup>1</sup> School of Resources, Environment, and Materials, Guangxi University, Nanning 530000, China; 2015391083@st.gxu.edu.cn (X.H.); 13768371312@163.com (X.Z.); wdmzsdqf@gmail.com (Q.D.)

<sup>2</sup> MOE Key Laboratory of New Processing Technology for Non-Ferrous Metals and Materials; Nanning 530000, China

\* Correspondence: q\_zhiyong@163.com; Tel.: +86-182-7710-5246

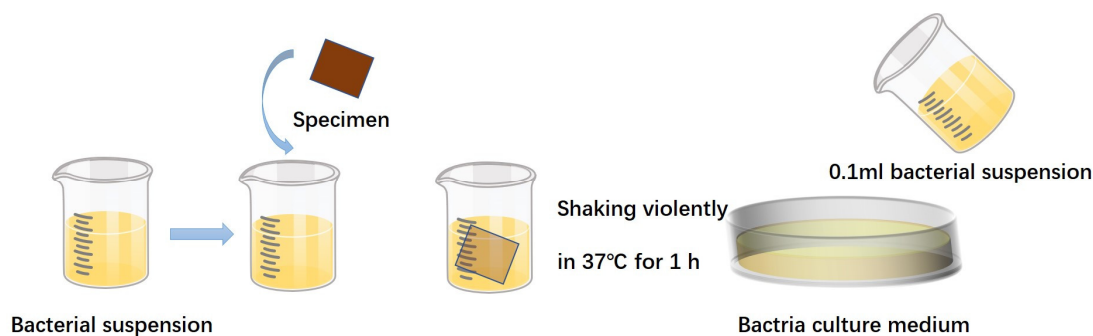

**Figure S1.** Schematic illustration of the method of antibacterial experiment.

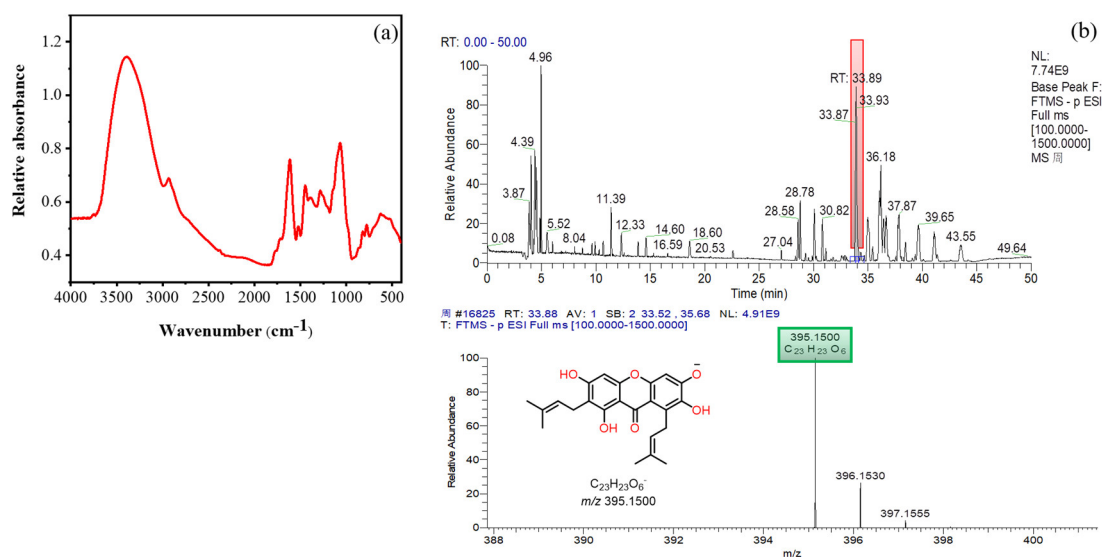

**Figure S2.** Absorption spectrum of MPE (a) and analysis of the structure of MPE by HPLC (b). As in the base peak ion outflow diagram, the presence of the suspected compounds in the MPE is shown at different moments. The time of 33.89 corresponds to the molecular weight of the suspected compound of 395.1500.

the molecular formula of the compound is  $C_{23}H_{23}O_6$ , which corresponds to the main component of MPE,  $\gamma$ -mangosteen, according to the primary spectrum and the resolution results.

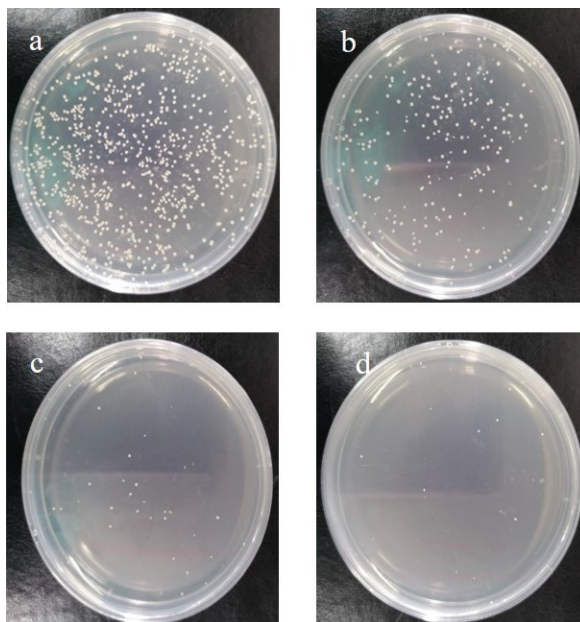

**Figure S3.** Antibacterial effect of SPI/MPE/ZnO films against *E. coli*. SPI control(a); SPI/MPE/ZnO<sup>1%</sup>(b); SPI/MPE/ZnO<sup>3%</sup>(c) and SPI/MPE/ZnO<sup>5%</sup>(d).

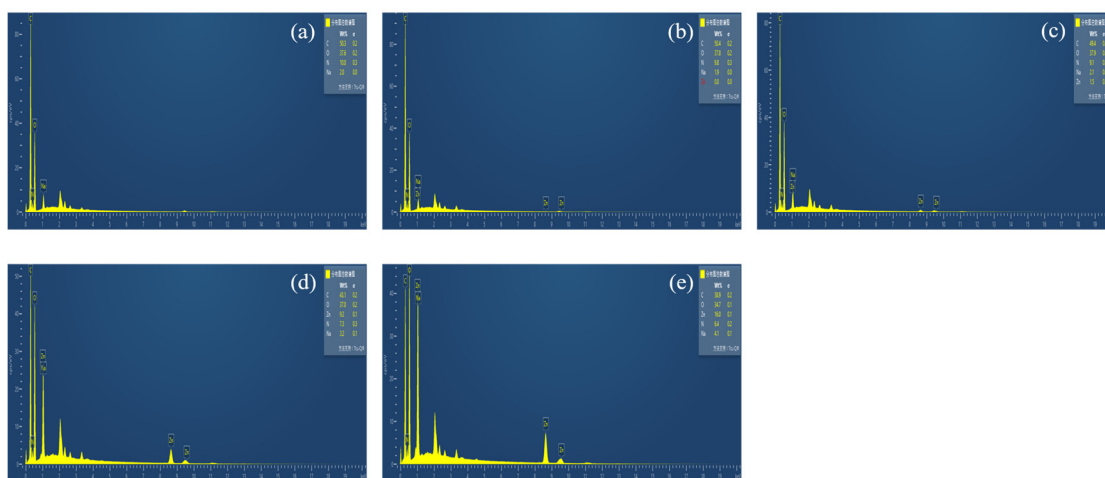

**Figure S4.** EDX spectra of SPI films for SPI control (a), SPI/MPE (b), SPI/MPE/ZnO<sup>1%</sup>(c), SPI/MPE/ZnO<sup>3%</sup>(d) and SPI/MPE/ZnO<sup>5%</sup>(e) film, respectively.

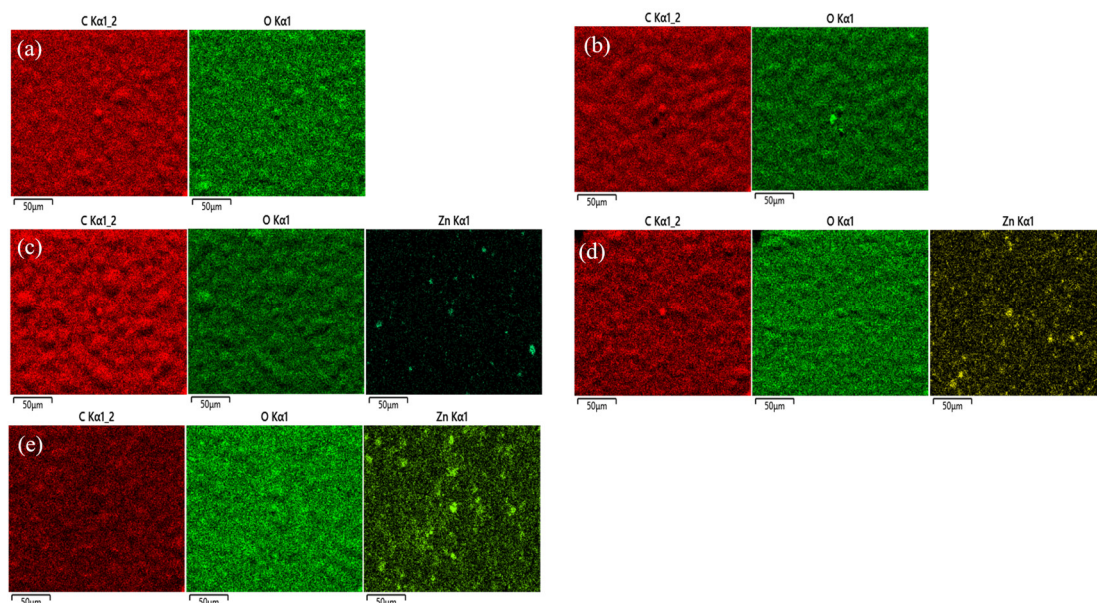

**Figure S5.** The elemental mapping analysis (MAP) for SPI control (a), SPI/MPE (b), SPI/MPE/ZnO<sup>1%</sup>(c), SPI/MPE/ZnO<sup>3%</sup>(d) and SPI/MPE/ZnO<sup>5%</sup> (e) film, respectively.

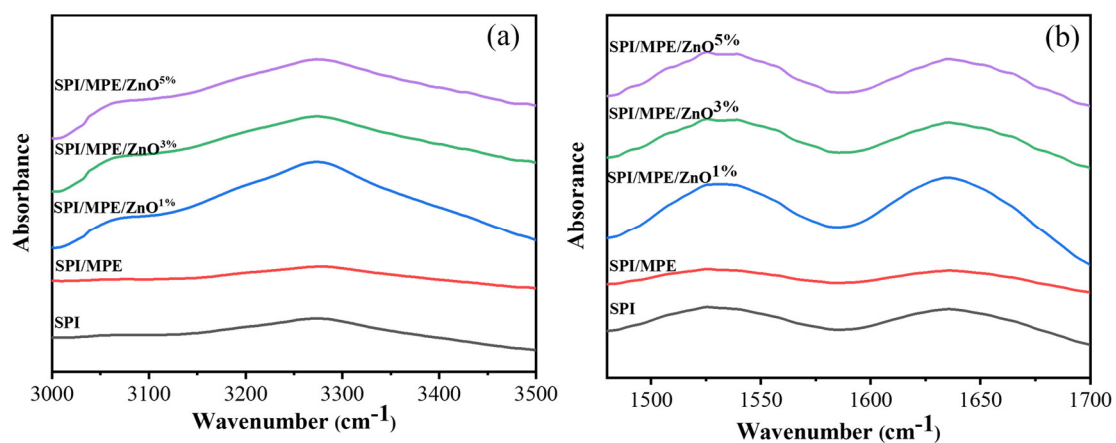

**Figure S6.** ATR-FTIR spectra of SPI films for amide-A (A) and amide I (B).

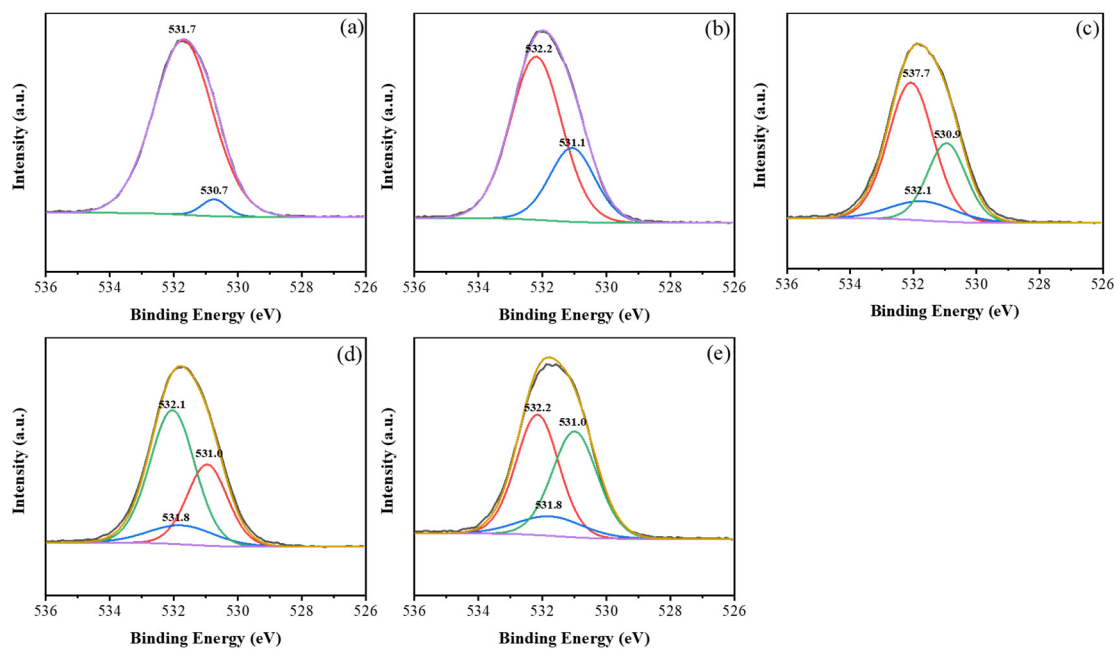

**Figure S7.** XPS of O 1s features of SPI films for SPI control (a), SPI/MPE (b), SPI/MPE/ZnO<sup>1%</sup> (c), SPI/MPE/ZnO<sup>3%</sup> (d) and SPI/MPE/ZnO<sup>5%</sup> (e) film, respectively.

**Table S1.** Experimental formulations of the SPI films.

| Films                     | 5% SPI (g) <sup>a</sup> | 0.5% CMC (g) <sup>b</sup> | Glycerol (g) <sup>c</sup> | 0.5% ZnO (g) <sup>d</sup> | MPE (g) <sup>e</sup> |
|---------------------------|-------------------------|---------------------------|---------------------------|---------------------------|----------------------|
| SPI                       | 25                      | 5                         | 0.375                     | 0                         | 0                    |
| SPI/MPE                   | 25                      | 5                         | 0.375                     | 0                         | 0.125                |
| SPI/MPE/ZnO <sup>1%</sup> | 25                      | 5                         | 0.375                     | 2.5                       | 0.125                |
| SPI/MPE/ZnO <sup>3%</sup> | 25                      | 5                         | 0.375                     | 7.5                       | 0.125                |
| SPI/MPE/ZnO <sup>5%</sup> | 25                      | 5                         | 0.375                     | 12.5                      | 0.125                |

<sup>a</sup> 5 wt% solution.<sup>b</sup> 0.5 wt% solution, 2 wt% based on dry weight of SPI.<sup>c</sup> 30 wt% on a dry weight basis of SPI.<sup>d</sup> 0.5 wt% solution, 0, 1, 3, 5 wt% on a dry weight basis of SPI.<sup>e</sup> 10 wt% on a dry weight basis of SPI.**Table S2.** Colour and opacity of SPI films as affected by MPE and ZnO NPs incorporation.

| Films                     | L*                        | a*                        | b*                        | ΔE*                       | Opacity values           |
|---------------------------|---------------------------|---------------------------|---------------------------|---------------------------|--------------------------|
| SPI                       | 86.34 ± 0.19 <sup>a</sup> | 0.91 ± 0.26 <sup>c</sup>  | 20.92 ± 0.16 <sup>e</sup> | 5.44 ± 0.20 <sup>d</sup>  | 1.07 ± 0.20 <sup>d</sup> |
| SPI/MPE                   | 74.50 ± 0.31 <sup>b</sup> | 8.49 ± 0.01 <sup>d</sup>  | 38.02 ± 0.21 <sup>d</sup> | 27.60 ± 0.32 <sup>c</sup> | 1.47 ± 0.27 <sup>d</sup> |
| SPI/MPE/ZnO <sup>1%</sup> | 65.02 ± 0.02 <sup>c</sup> | 15.54 ± 0.06 <sup>a</sup> | 50.16 ± 0.26 <sup>a</sup> | 44.44 ± 0.19 <sup>a</sup> | 2.24 ± 0.02 <sup>c</sup> |
| SPI/MPE/ZnO <sup>3%</sup> | 62.28 ± 0.12 <sup>d</sup> | 14.23 ± 0.02 <sup>b</sup> | 48.59 ± 0.3 <sup>b</sup>  | 44.27 ± 0.26 <sup>a</sup> | 3.33 ± 0.64 <sup>b</sup> |
| SPI/MPE/ZnO <sup>5%</sup> | 62.20 ± 0.03 <sup>d</sup> | 13.24 ± 0.08 <sup>c</sup> | 46.86 ± 0.22 <sup>c</sup> | 42.73 ± 0.14 <sup>b</sup> | 6.12 ± 0.66 <sup>a</sup> |

\*All data were expressed as mean ± standard deviation (SD). Different letters indicated significant difference (p≤0.05).

**Table S3.** Antibacterial properties of SPI films incorporated with ZnO NPs.

| Films<br>Bacterial colony | SPI                          | SPI/ZnO <sup>1%</sup>      | SPI/ZnO <sup>3%</sup>      | SPI/ZnO <sup>5%</sup>      |
|---------------------------|------------------------------|----------------------------|----------------------------|----------------------------|
| E. coli                   | 845 ± 9.90 <sup>a</sup>      | 539.5 ± 31.82 <sup>b</sup> | 78.50 ± 10.61 <sup>c</sup> | 76.00 ± 11.31 <sup>c</sup> |
| Bactericidal rate (%)     | 0                            | 36.83                      | 90.81                      | 91.10                      |
| S. aureus                 | 1143.00 ± 53.74 <sup>a</sup> | 105.50 ± 2.12 <sup>b</sup> | 24.00 ± 0.00 <sup>c</sup>  | 12.50 ± 2.12 <sup>c</sup>  |
| Bactericidal rate (%)     | 0                            | 90.77                      | 97.90                      | 98.91                      |

All data were expressed as mean ± standard deviation (SD). Different letters indicated significant difference (p≤0.05).

**Table S4.** Roughness of SPI films.

| <b>Films<br/>Roughness</b>          | <b>SPI</b> | <b>SPI/MPE</b> | <b>SPI/MPE/ZnO<sup>1%</sup></b> | <b>SPI/MPE/ZnO<sup>3%</sup></b> | <b>SPI/MPE/ZnO<sup>5%</sup></b> |
|-------------------------------------|------------|----------------|---------------------------------|---------------------------------|---------------------------------|
| Average roughness, Ra (nm)          | 11.663     | 6.765          | 9.032                           | 9.238                           | 19.729                          |
| Root mean square roughness, Rq (nm) | 15.844     | 9.663          | 11.683                          | 12.326                          | 27.059                          |

Where Ra represents the arithmetic mean value of the surface height deviation determined from the average plane; Rq is the root mean square of the height deviation derived from the average image data plane.

**Table S5** Mass loss calculated from thermal parameters of the TGA curve.

| <b>Films</b>              | <b>LM<sub>1</sub> (%)</b> | <b>Td<sub>max1</sub>(°C)</b> | <b>LM<sub>2</sub> (%)</b> | <b>Td<sub>max2</sub> (°C)</b> | <b>RM (%)</b> |
|---------------------------|---------------------------|------------------------------|---------------------------|-------------------------------|---------------|
| SPI control               | 11.13                     | 99.74                        | 66.06                     | 306.37                        | 22.39         |
| SPI/MPE                   | 9.63                      | 100.42                       | 67.22                     | 306.86                        | 23.15         |
| SPI/MPE/ZnO <sup>1%</sup> | 10.98                     | 79.06                        | 61.78                     | 300.96                        | 27.25         |
| SPI/MPE/ZnO <sup>3%</sup> | 12.38                     | 67.44                        | 59.76                     | 302.53                        | 27.86         |
| SPI/MPE/ZnO <sup>5%</sup> | 14.15                     | 72.71                        | 56.23                     | 269.14                        | 29.63         |

LM<sub>1</sub>=loss of mass in the first event (dehydration), LM<sub>2</sub>=second event (decomposition), RM=residual mass at 650 °C.

**Table S6** Relative amounts (%) of carbon (C 1s) on the surfaces of SPI films.

| <b>Films</b>              | <b>C1 (%)</b> | <b>C2 (%)</b> | <b>C3 (%)</b> |
|---------------------------|---------------|---------------|---------------|
| SPI control               | 66.40         | 19.81         | 13.79         |
| SPI/MPE                   | 58.08         | 26.00         | 15.92         |
| SPI/MPE/ZnO <sup>1%</sup> | 58.03         | 26.35         | 15.62         |
| SPI/MPE/ZnO <sup>3%</sup> | 60.04         | 24.86         | 15.10         |
| SPI/MPE/ZnO <sup>5%</sup> | 63.43         | 22.22         | 14.35         |
